# Supplementary material
Source: HighWire-hosted journal article supplement (http://www.qdcxjkg.com/highwire/filestream/132145/field_highwire_adjunct_files/0/ERJ-01826-2015_Figures_tables.pdf)

Supplemental Table E1

|                    | <b>Antigen</b> | <b>Fluorophore</b> | <b>Clone</b> | <b>Manufacturer</b> | <b>Isotype</b> |
|--------------------|----------------|--------------------|--------------|---------------------|----------------|
| <b>MDSCs</b>       | CD33           | BV421              | WM53         | BioLegend           | Mouse IgG1     |
|                    | CD56           | FITC               | HCD56        | BioLegend           | Mouse IgG1     |
|                    | CD20           | FITC               | 2H7          | BioLegend           | Mouse IgG2b    |
|                    | CD19           | FITC               | HIB19        | BioLegend           | Mouse IgG1     |
|                    | CD16           | FITC               | 3G8          | BioLegend           | Mouse IgG1     |
|                    | CD66b          | PE                 | G10F5        | BioLegend           | Mouse IgM      |
|                    | CD11b          | PerCPCy5.5         | ICRF44       | BioLegend           | Mouse IgG1     |
|                    | HLA-DR         | PE Cy7             | L243         | BioLegend           | Mouse IgG2a    |
|                    | CD80           | APC                | 2D10         | BioLegend           | Mouse IgG1     |
|                    | CD14           | APC Cy7            | HCD14        | BioLegend           | Mouse IgG1     |
| <b>Lymphocytes</b> | CD25           | BV421              | 2A3          | BD Bioscience       | Mouse IgG1     |
|                    | CD19           | FITC               | HIB19        | BioLegend           | Mouse IgG1     |
|                    | CCR7           | PE                 | 150503       | R&D                 | Mouse IgG2a    |
|                    | CD3            | AF700              | HIT3a        | BioLegend           | Mouse IgG2a    |
|                    | CD8a           | PE Cy7             | HIT8a        | BioLegend           | Mouse IgG1     |
|                    | CD27           | APC                | M-T271       | BioLegend           | Mouse IgG1     |
|                    | CD4            | BV510              | RPA-T4       | BioLegend           | Mouse IgG1     |

Supplemental Figure E1

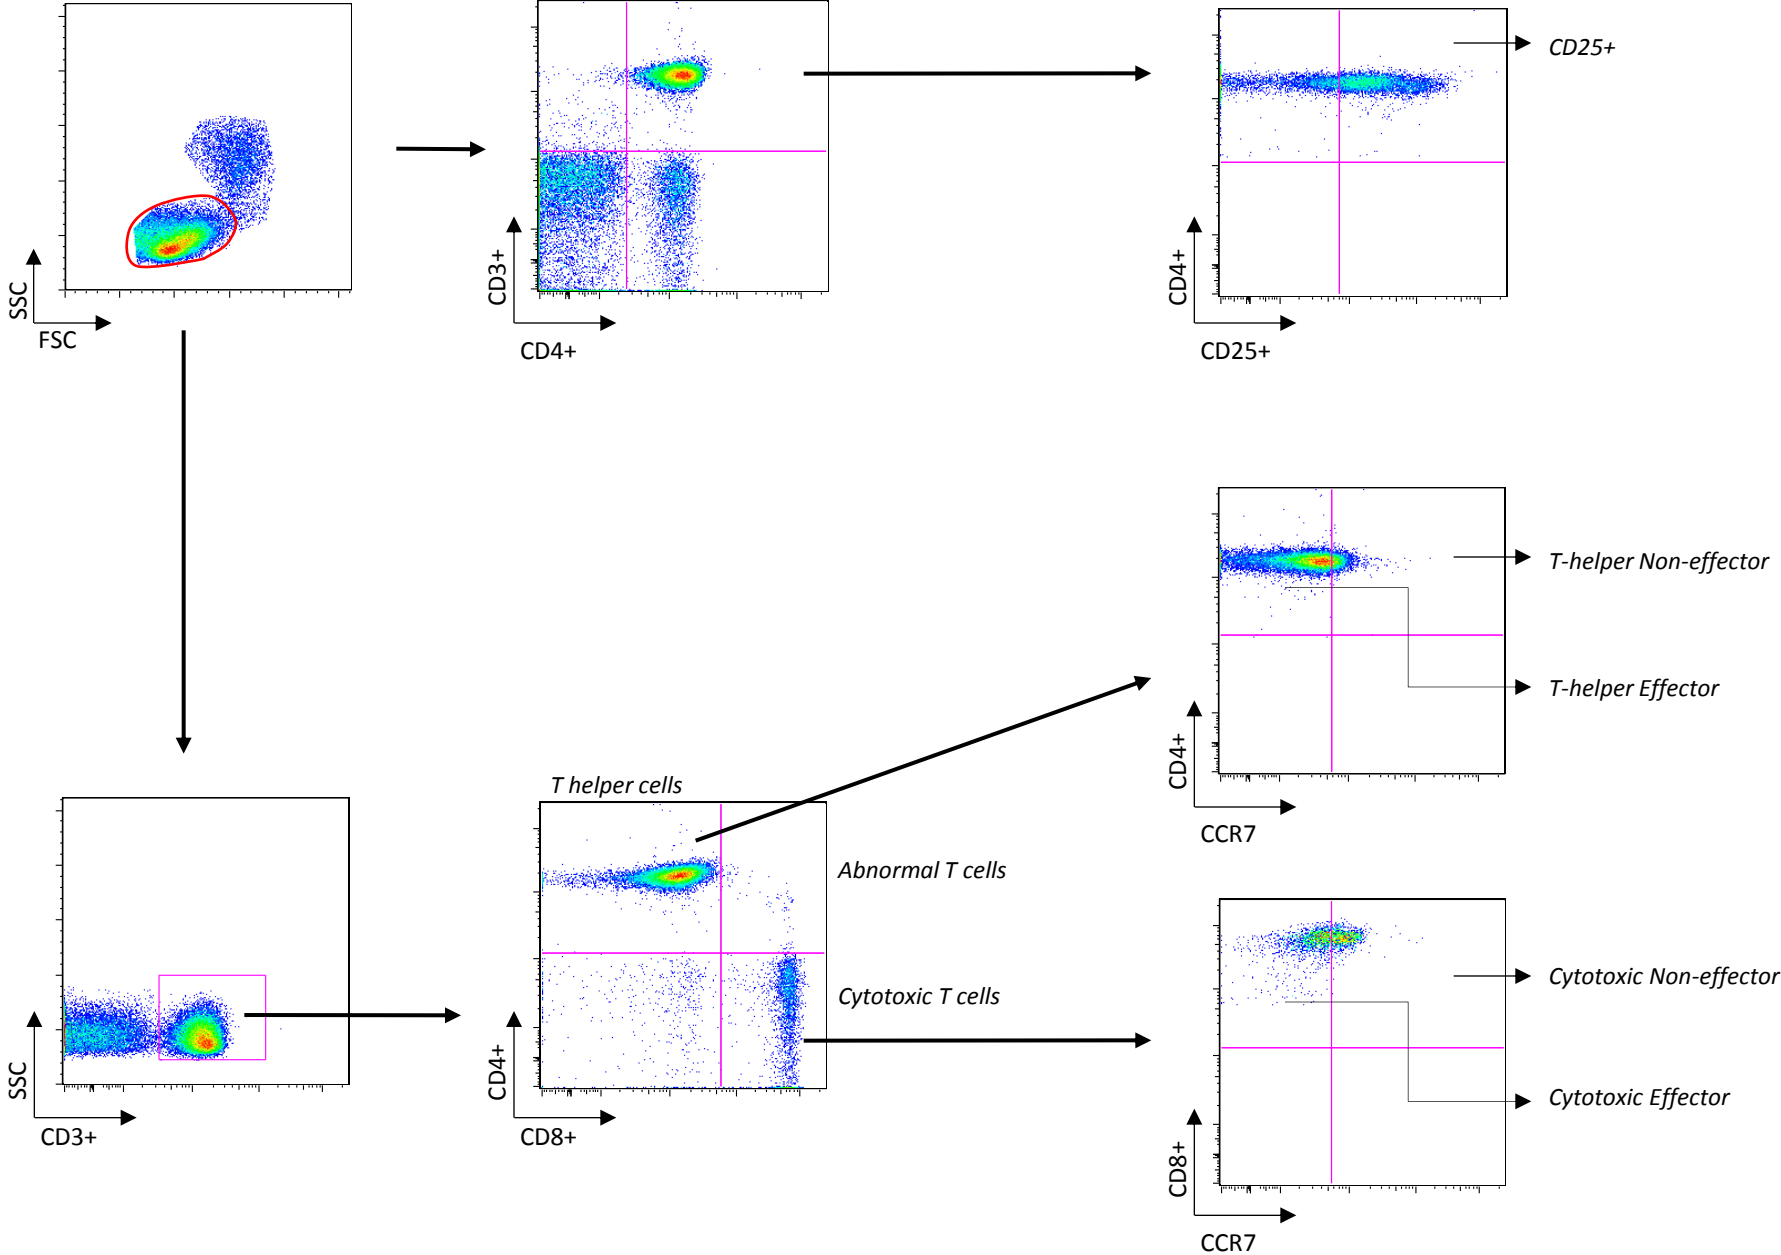

Females

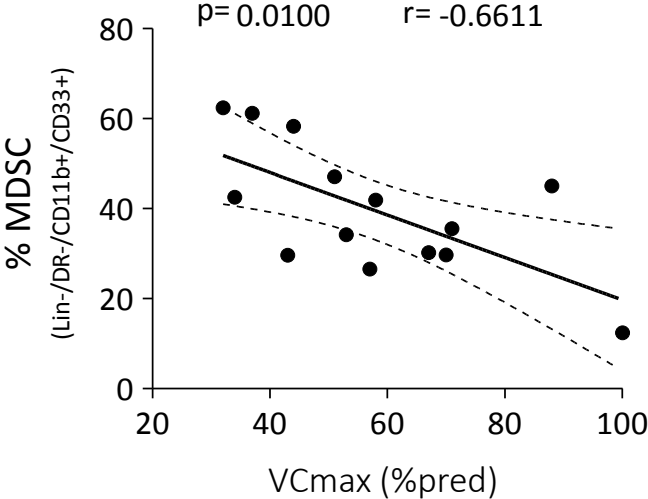

Males

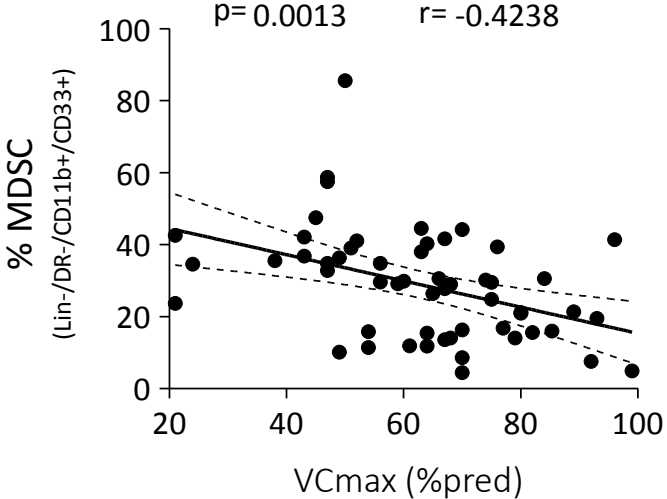

# Supplemental Figure E3

A

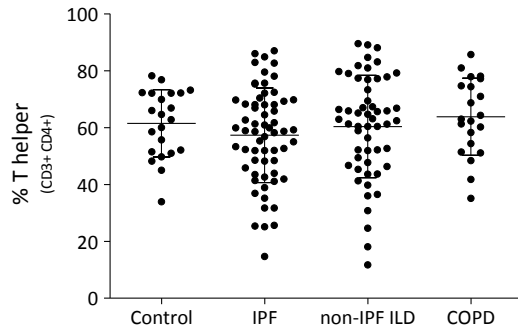

B

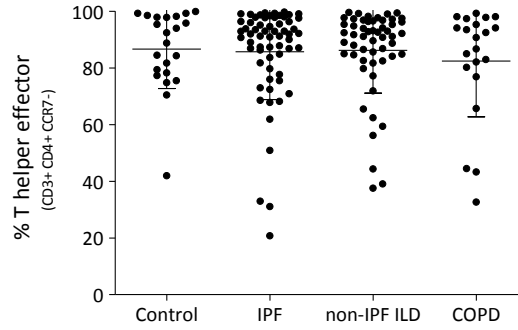

C

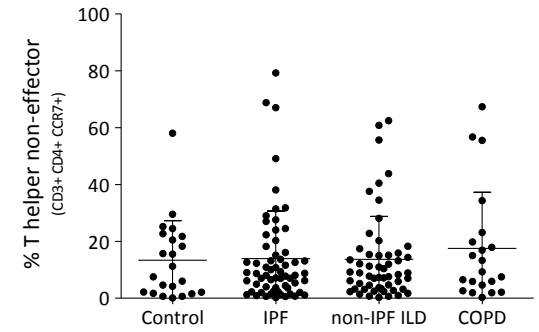

D

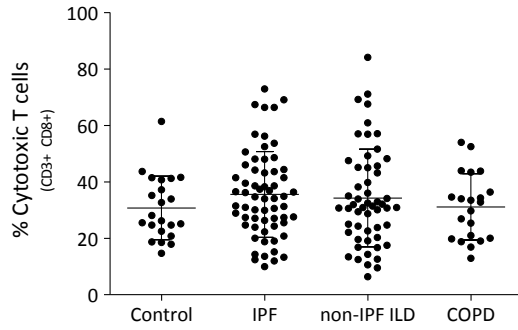

E

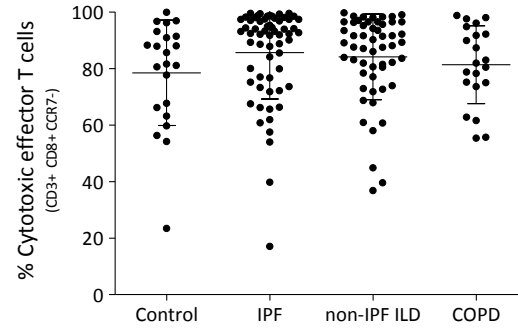

F

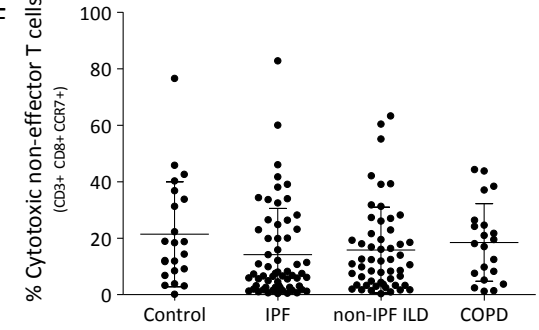

G

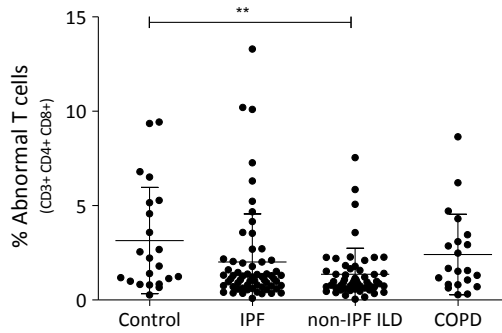

Supplement: ERJ-01826-2015_Figures_tables.pdf [file ERJ-01826-2015_Figures_tables.pdf]
